# Supplementary material for: Congolius, a new genus of African reed frog endemic to the central Congo: A potential case of convergent evolution
Source: PubMed Central journal article supplement (PMC8052363; doi:10.1038/s41598-021-87495-2), 2021-04-16
Supplement: 41598_2021_87495_MOESM1_ESM.pdf [file 41598_2021_87495_MOESM1_ESM.pdf]

## ***Congolius*, a new genus of African reed frog endemic to the central Congo: A potential case of convergent evolution**

Tadeáš Nečas\*, Gabriel Badjedjea, Michal Vopálenský & Václav Gvoždík\*

\*Corresponding authors: T. N. (email: tad.necas@gmail.com) and V. G. (email: vaclav.gvozdik@gmail.com)

### Supplementary material

| <b>Content</b>                                                                                                                                | <b>Page</b> |
|-----------------------------------------------------------------------------------------------------------------------------------------------|-------------|
| <b>Fig. S1.</b> Holotype and allotype of <i>Hyperolius robustus</i> Laurent, 1979.                                                            | 1           |
| <b>Fig. S2.</b> Sexual dichromatism in <i>Congolius robustus</i> gen. et comb. n.                                                             | 2           |
| <b>Table S1.</b> Main material examined.                                                                                                      | 3           |
| <b>Appendix S1.</b> Additional material examined.                                                                                             | 6           |
| <b>Appendix S2.</b> Distribution records of <i>Congolius robustus</i> gen. et comb. n.                                                        | 7           |
| <b>Fig. S3.</b> Bayesian phylogenetic trees of (a–e) individual genetic markers, and (f) concatenated data set based on four nuclear markers. | 8           |
| <b>Appendix S3.</b> Resources for comparative diagnosis of <i>Congolius</i> gen. n. with other genera of the family Hyperoliidae.             | 9           |
| <b>Table S2.</b> Uncorrected <i>p</i> -distances based on a fragment of the 16S rRNA gene.                                                    | 10          |
| <b>Table S3.</b> Factor loadings of the first three principal components of PCA of body shape.                                                | 11          |
| <b>Fig. S4.</b> Cranial morphology of all osteologically examined taxa.                                                                       | 12          |
| <b>Table S4.</b> Factor scores of the first two principal components of PCA of cranial shape.                                                 | 14          |
| <b>Table S5.</b> Taxa and samples included in phylogenetic analyses with GenBank accession numbers.                                           | 15          |
| <b>Table S6.</b> Primers used to amplify selected molecular markers.                                                                          | 16          |
| <b>Table S7.</b> Substitution models used in phylogenetic analyses.                                                                           | 17          |
| <b>Fig. S5.</b> Visualization of 16 measured characters.                                                                                      | 18          |
| <b>Fig. S6.</b> Visualization of 32 digitized landmarks.                                                                                      | 19          |
| <b>Appendix S4.</b> References used in Supplementary material.                                                                                | 20          |

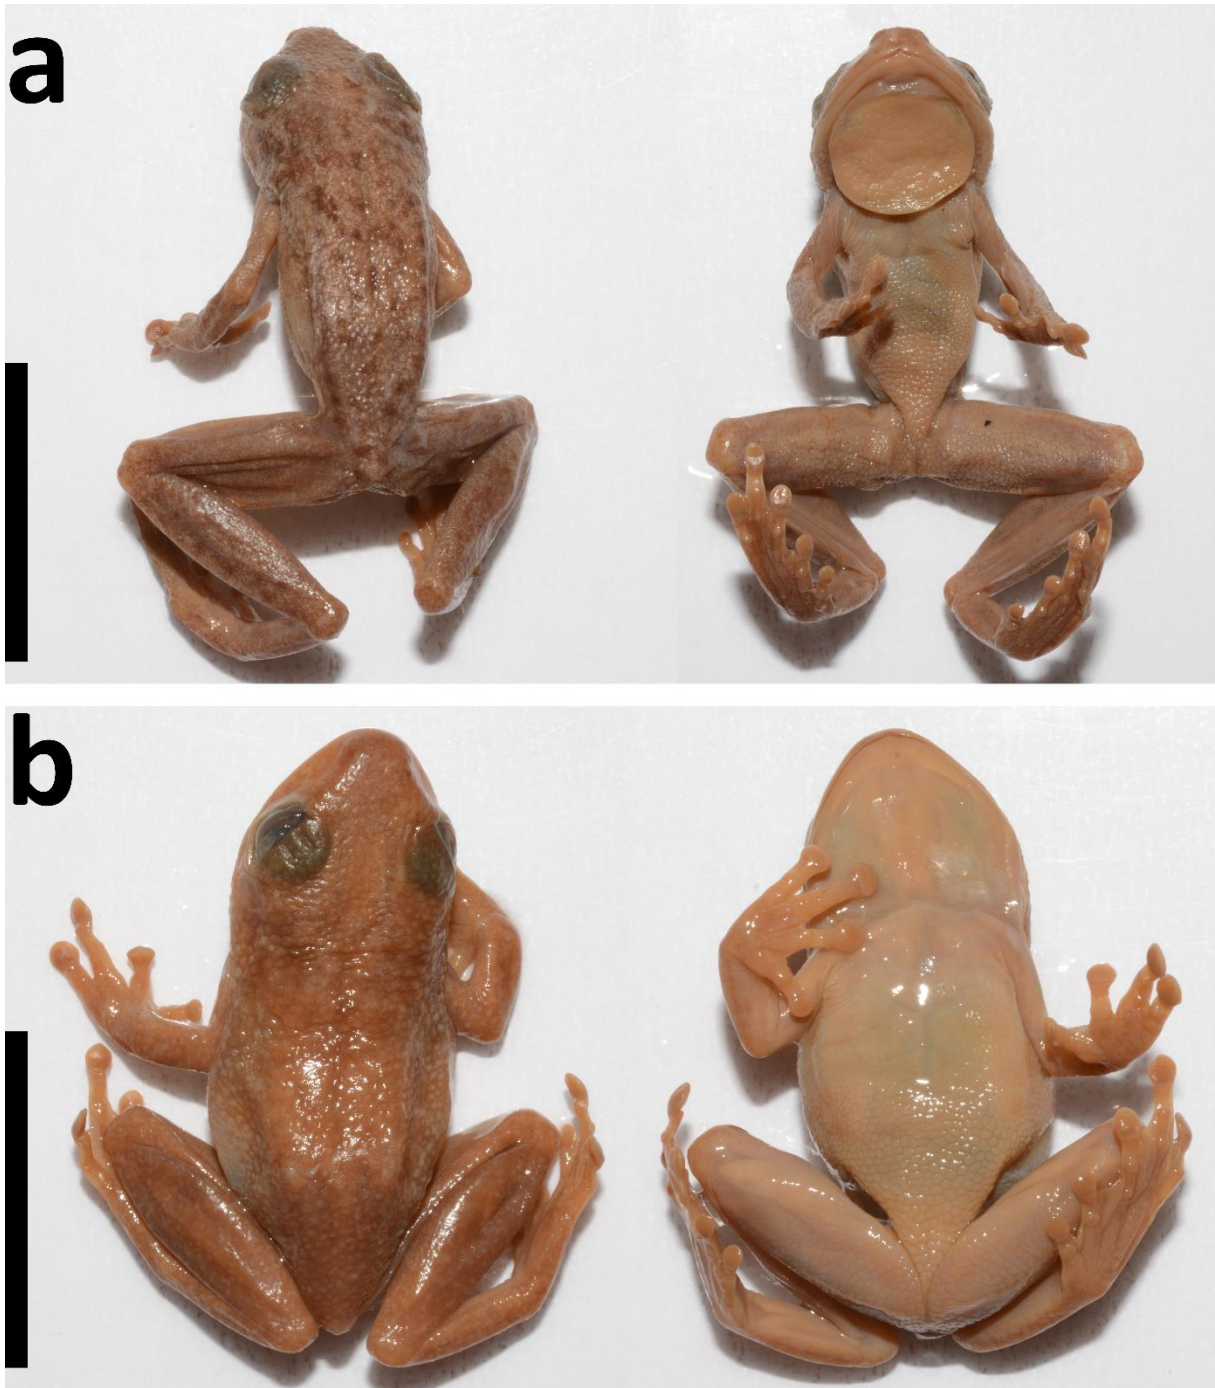

**Figure S1. Holotype and allotype of *Hyperolius robustus* Laurent, 1979. (a) Holotype RMCA 79-24-B-4, male; (b) allotype RMCA 79-24-B-5, female. Scale = 20 mm. Photos by V. G.**

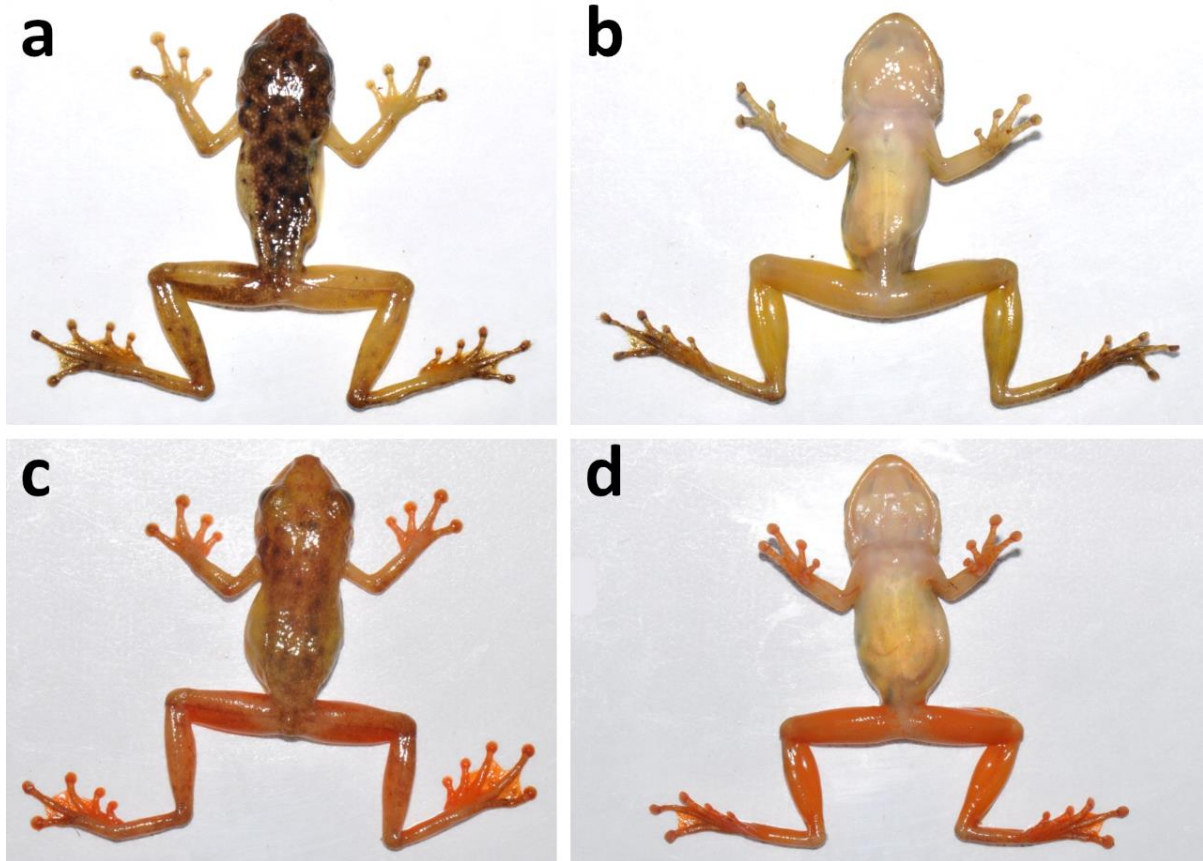

**Figure S2. Sexual dichromatism in *Congolius robustus* gen. et comb. n.** (a, b) Adult male IVB-H-CD18-301 and (c, d) adult female IVB-H-CD18-302 from the Kokolopori Bonobo Nature Reserve, Tshuapa, Democratic Republic of the Congo (DRC). Photos by V. G.

**Table S1. Main material examined.** Asterisk denotes specimens of *Congolius robustus* gen. et comb. n. included in phylogenetic analysis. “Morph” stands for external morphometric analyses; (+) denotes  $\mu$ CT scanned specimens that were not included in PCA of the cranial shape; CAR = Central African Republic.

| Taxon                                         | Catalogue No.   | Sex    | Locality                                                               | GPS          |              | $\mu$ CT | Morph |
|-----------------------------------------------|-----------------|--------|------------------------------------------------------------------------|--------------|--------------|----------|-------|
|                                               |                 |        |                                                                        | $^{\circ}$ N | $^{\circ}$ E |          |       |
| <i>Acanthixalus spinosus</i>                  | CAS 153800      | female | Sangmelima, Foulassi, Ngam, Sud Region, Cameroon                       | 2.9845       | 11.9612      | (+)      | -     |
| <i>Callixalus pictus</i>                      | CAS 145260      | male   | Itombwe Highlands, upper Luvubu River, Kivu Prov., DRC, 2600 m         | -3.2162      | 28.8612      | (+)      | -     |
| <i>Chrysobatrachus cupreonitens</i>           | CAS 145263      | male   | Itombwe Highlands, upper Luvubu River, Kivu Prov., DRC, 2600 m         | -3.2162      | 28.8612      | (+)      | -     |
| <i>Congolius robustus</i><br>gen. et comb. n. | IVB-H-CD18-120  | male   | Yetee, Loto stream, Kokolopori, Tshuapa, DRC, 460 m                    | 0.4080       | 22.9284      | -        | +     |
| <i>Congolius robustus</i> *                   | IVB-H-CD18-255  | male   | Yalokole, Iyoto stream, Kokolopori, Tshuapa, DRC, 400 m                | 0.2136       | 22.8949      | -        | +     |
| <i>Congolius robustus</i>                     | NMP-P6V 76086/1 | male   | Yalokole, Iyoto stream, Kokolopori, Tshuapa, DRC, 400 m                | 0.2136       | 22.8949      | -        | +     |
| <i>Congolius robustus</i>                     | NMP-P6V 76086/2 | male   | Yalokole, Iyoto stream, Kokolopori, Tshuapa, DRC, 400 m                | 0.2136       | 22.8949      | -        | +     |
| <i>Congolius robustus</i>                     | NMP-P6V 76086/4 | male   | Yalokole, Iyoto stream, Kokolopori, Tshuapa, DRC, 400 m                | 0.2136       | 22.8949      | -        | +     |
| <i>Congolius robustus</i>                     | NMP-P6V 76086/5 | male   | Yalokole, Iyoto stream, Kokolopori, Tshuapa, DRC, 400 m                | 0.2136       | 22.8949      | -        | +     |
| <i>Congolius robustus</i>                     | NMP-P6V 76086/8 | male   | Yalokole, Iyoto stream, Kokolopori, Tshuapa, DRC, 400 m                | 0.2136       | 22.8949      | -        | +     |
| <i>Congolius robustus</i>                     | NMP-P6V 76086/9 | male   | Yalokole, Iyoto stream, Kokolopori, Tshuapa, DRC, 400 m                | 0.2136       | 22.8949      | -        | +     |
| <i>Congolius robustus</i>                     | NMP-P6V 76088   | male   | Yambimbo, Sondo stream, Kokolopori, Tshuapa, DRC, 420 m                | 0.2235       | 22.8627      | -        | +     |
| <i>Congolius robustus</i> *                   | NMP-P6V 76089   | female | Mombongo, Luende stream, Tshopo, DRC                                   | 1.64         | 23.15        | -        | -     |
| <i>Congolius robustus</i>                     | ZMUC-R.771175   | male   | Kokolopori, Tshuapa, DRC                                               | 0.25         | 22.87        | +        | +     |
| <i>Congolius robustus</i> *                   | ZMUC-R.771176   | female | Kokolopori, Tshuapa, DRC                                               | 0.25         | 22.87        | (+)      | -     |
| <i>Cryptothylax greshoffii</i>                | IVB-H-CD15-162  | male   | Lopori River, Matama, Lobeke swamp, Mongala, DRC, 365 m                | 1.6366       | 21.4172      | -        | +     |
| <i>Cryptothylax greshoffii</i>                | IVB-H-CD15-169  | male   | Lopori River, Matama, Lobeke swamp, Mongala, DRC, 365 m                | 1.6366       | 21.4172      | +        | +     |
| <i>Cryptothylax greshoffii</i>                | IVB-H-CD15-170  | male   | Lopori River, Matama, Lobeke swamp, Mongala, DRC, 365 m                | 1.6366       | 21.4172      | -        | +     |
| <i>Cryptothylax greshoffii</i>                | NMP-P6V 76074/1 | male   | Sangha Lodge, swamp, Sangha-Mbaéré, Dzanga-Sangha NP, CAR, 380 m       | 2.99         | 16.23        | -        | +     |
| <i>Cryptothylax greshoffii</i>                | NMP-P6V 76075/1 | male   | Sangha Lodge, forest pond, Sangha-Mbaéré, Dzanga-Sangha NP, CAR, 380 m | 2.9852       | 16.2327      | -        | +     |
| <i>Cryptothylax greshoffii</i>                | NMP-P6V 76075/2 | male   | Sangha Lodge, forest pond, Sangha-Mbaéré, Dzanga-Sangha NP, CAR, 380 m | 2.9852       | 16.2327      | -        | +     |
| <i>Cryptothylax greshoffii</i>                | NMP-P6V 76076/1 | male   | Mosite, pond, Tshopo, DRC, 420 m                                       | 0.9594       | 23.5549      | -        | +     |
| <i>Cryptothylax greshoffii</i>                | NMP-P6V 76076/2 | male   | Mosite, pond, Tshopo, DRC, 420 m                                       | 0.9594       | 23.5549      | -        | +     |

| Taxon                                          | Catalogue No.   | Sex  | Locality                                                      | GPS    |         | μCT | Morph |
|------------------------------------------------|-----------------|------|---------------------------------------------------------------|--------|---------|-----|-------|
|                                                |                 |      |                                                               | °N     | °E      |     |       |
| <i>Cryptothylax greshoffii</i>                 | NMP-P6V 76077/7 | male | Yetee, Loto stream, Kokolopori, Tshuapa, DRC, 460 m           | 0.408  | 22.9284 | -   | +     |
| <i>Cryptothylax greshoffii</i>                 | NMP-P6V 76078/1 | male | Yalofili, Bisolo stream, Tshuapa, DRC, 400 m                  | 0.2105 | 22.8186 | -   | +     |
| <i>Hyperolius balfouri</i>                     | IVB-H-CD15-061  | male | Lisala, swamp, Mongala, DRC, 348 m                            | 2.1503 | 21.5285 | +   | -     |
| <i>Hyperolius balfouri</i>                     | NMP-P6V 76079/1 | male | Baboungue, Sangha-Mbaéré, Dzanga-Sangha NP, CAR, 550 m        | 3.2815 | 16.1854 | -   | +     |
| <i>Hyperolius balfouri</i>                     | NMP-P6V 76079/2 | male | Baboungue, Sangha-Mbaéré, Dzanga-Sangha NP, CAR, 550 m        | 3.2815 | 16.1854 | -   | +     |
| <i>Hyperolius balfouri</i>                     | NMP-P6V 76080/1 | male | Baboungue, Sangha-Mbaéré, Dzanga-Sangha NP, CAR, 550 m        | 3.2815 | 16.1854 | -   | +     |
| <i>Hyperolius balfouri</i>                     | NMP-P6V 76080/3 | male | Baboungue, Sangha-Mbaéré, Dzanga-Sangha NP, CAR, 550 m        | 3.2815 | 16.1854 | -   | +     |
| <i>Hyperolius balfouri</i>                     | NMP-P6V 76080/4 | male | Baboungue, Sangha-Mbaéré, Dzanga-Sangha NP, CAR, 550 m        | 3.2815 | 16.1854 | -   | +     |
| <i>Hyperolius balfouri</i>                     | NMP-P6V 76081/2 | male | Monasau, by road, Sangha-Mbaéré, Dzanga-Sangha NP, CAR, 530 m | 3.2487 | 16.2526 | -   | +     |
| <i>Hyperolius balfouri</i>                     | NMP-P6V 76081/1 | male | Monasau, by road, Sangha-Mbaéré, Dzanga-Sangha NP, CAR, 530 m | 3.2487 | 16.2526 | -   | +     |
| <i>Hyperolius balfouri</i>                     | NMP-P6V 76081/2 | male | Monasau, by road, Sangha-Mbaéré, Dzanga-Sangha NP, CAR, 530 m | 3.2487 | 16.2526 | -   | +     |
| <i>Hyperolius balfouri</i>                     | NMP-P6V 76081/3 | male | Monasau, by road, Sangha-Mbaéré, Dzanga-Sangha NP, CAR, 530 m | 3.2487 | 16.2526 | -   | +     |
| <i>Hyperolius balfouri</i>                     | NMP-P6V 76081/5 | male | Monasau, by road, Sangha-Mbaéré, Dzanga-Sangha NP, CAR, 530 m | 3.2487 | 16.2526 | -   | +     |
| <i>Hyperolius cinnamomeoventris</i><br>complex | IVB-H-CD18-092  | male | Yetee, spring, Kokolopori, Tshuapa, DRC, 470 m                | 0.4033 | 22.9302 | -   | +     |
| <i>Hyperolius cinnamomeoventris</i><br>complex | IVB-H-CD18-107  | male | Yetee, Loto stream, Kokolopori, Tshuapa, DRC, 460 m           | 0.408  | 22.9284 | -   | +     |
| <i>Hyperolius cinnamomeoventris</i><br>complex | IVB-H-CD18-129  | male | Yetee, Loto stream, Kokolopori, Tshuapa, DRC, 460 m           | 0.408  | 22.9284 | -   | +     |
| <i>Hyperolius cinnamomeoventris</i><br>complex | IVB-H-CD18-130  | male | Yetee, Loto stream, Kokolopori, Tshuapa, DRC, 460 m           | 0.408  | 22.9284 | -   | +     |
| <i>Hyperolius cinnamomeoventris</i><br>complex | IVB-H-CD18-131  | male | Yetee, Loto stream, Kokolopori, Tshuapa, DRC, 460 m           | 0.408  | 22.9284 | -   | +     |
| <i>Hyperolius cinnamomeoventris</i><br>complex | IVB-H-CD18-132  | male | Yetee, Loto stream, Kokolopori, Tshuapa, DRC, 460 m           | 0.408  | 22.9284 | -   | +     |
| <i>Hyperolius cinnamomeoventris</i><br>complex | IVB-H-CD18-133  | male | Yetee, Loto stream, Kokolopori, Tshuapa, DRC, 460 m           | 0.408  | 22.9284 | -   | +     |
| <i>Hyperolius cinnamomeoventris</i><br>complex | IVB-H-CD18-134  | male | Yetee, Loto stream, Kokolopori, Tshuapa, DRC, 460 m           | 0.408  | 22.9284 | -   | +     |
| <i>Hyperolius cinnamomeoventris</i><br>complex | IVB-H-CD18-357  | male | Yambimbo, Sondo stream, Kokolopori, Tshuapa, DRC, 420 m       | 0.2255 | 22.8616 | -   | +     |
| <i>Hyperolius cinnamomeoventris</i><br>complex | IVB-H-CD18-358  | male | Yambimbo, Sondo stream, Kokolopori, Tshuapa, DRC, 430 m       | 0.2255 | 22.8616 | -   | +     |

| Taxon                                  | Catalogue No.    | Sex  | Locality                                                 | GPS     |         | μCT | Morph |
|----------------------------------------|------------------|------|----------------------------------------------------------|---------|---------|-----|-------|
|                                        |                  |      |                                                          | °N      | °E      |     |       |
| <i>Hyperolius phantasticus</i>         | IVB-H-CD18-192   | male | Yalokole, Iyoto stream, Kokolopori, Tshuapa, DRC, 400 m  | 0.2136  | 22.8949 | -   | +     |
| <i>Hyperolius phantasticus</i>         | IVB-H-CD18-202   | male | Yalofili, Bisolo stream, Kokolopori, Tshuapa, DRC, 400 m | 0.2105  | 22.8186 | -   | +     |
| <i>Hyperolius phantasticus</i>         | IVB-H-CD18-492   | male | Yambimbo, Sondo stream, Kokolopori, Tshuapa, DRC, 420 m  | 0.2269  | 22.8621 | -   | +     |
| <i>Hyperolius phantasticus</i>         | IVB-H-CD18-493   | male | Yambimbo, Sondo stream, Kokolopori, Tshuapa, DRC, 420 m  | 0.2269  | 22.8621 | -   | +     |
| <i>Hyperolius phantasticus</i>         | IVB-H-CD18-508   | male | Yambimbo, Sondo stream, Kokolopori, Tshuapa, DRC, 420 m  | 0.2269  | 22.8621 | -   | +     |
| <i>Hyperolius phantasticus</i>         | IVB-H-CD18-518   | male | Yambimbo, Sondo stream, Kokolopori, Tshuapa, DRC, 420 m  | 0.2269  | 22.8621 | -   | +     |
| <i>Hyperolius phantasticus</i>         | IVB-H-CD18-519   | male | Yambimbo, Sondo stream, Kokolopori, Tshuapa, DRC, 420 m  | 0.2269  | 22.8621 | -   | +     |
| <i>Hyperolius phantasticus</i>         | IVB-H-CD18-523   | male | Yambimbo, Sondo stream, Kokolopori, Tshuapa, DRC, 420 m  | 0.2269  | 22.8621 | -   | +     |
| <i>Hyperolius phantasticus</i>         | IVB-H-CD18-526   | male | Yambimbo, Sondo stream, Kokolopori, Tshuapa, DRC, 420 m  | 0.2269  | 22.8621 | -   | +     |
| <i>Hyperolius phantasticus</i>         | IVB-H-CD18-528   | male | Yambimbo, Sondo stream, Kokolopori, Tshuapa, DRC, 420 m  | 0.2269  | 22.8621 | -   | +     |
| <i>Hyperolius tuberculatus</i> complex | NMP-P6V 76082/1  | male | Mafamba, camp, Pool, Rep. Congo, 282 m                   | -4.2789 | 16.1973 | -   | +     |
| <i>Hyperolius tuberculatus</i> complex | NMP-P6V 76082/4  | male | Mafamba, camp, Pool, Rep. Congo, 282 m                   | -4.2789 | 16.1973 | -   | +     |
| <i>Hyperolius tuberculatus</i> complex | NMP-P6V 76082/5  | male | Mafamba, camp, Pool, Rep. Congo, 282 m                   | -4.2789 | 16.1973 | -   | +     |
| <i>Hyperolius tuberculatus</i> complex | NMP-P6V 76082/7  | male | Mafamba, camp, Pool, Rep. Congo, 282 m                   | -4.2789 | 16.1973 | -   | +     |
| <i>Hyperolius tuberculatus</i> complex | NMP-P6V 76082/8  | male | Mafamba, camp, Pool, Rep. Congo, 282 m                   | -4.2789 | 16.1973 | -   | +     |
| <i>Hyperolius tuberculatus</i> complex | NMP-P6V 76082/10 | male | Mafamba, camp, Pool, Rep. Congo, 282 m                   | -4.2789 | 16.1973 | -   | +     |
| <i>Hyperolius tuberculatus</i> complex | NMP-P6V 76082/11 | male | Mafamba, camp, Pool, Rep. Congo, 282 m                   | -4.2789 | 16.1973 | -   | +     |
| <i>Hyperolius tuberculatus</i> complex | NMP-P6V 76082/14 | male | Mafamba, camp, Pool, Rep. Congo, 282 m                   | -4.2789 | 16.1973 | -   | +     |
| <i>Hyperolius tuberculatus</i> complex | NMP-P6V 76083    | male | Mafamba, site 1, Pool, Rep. Congo, 274 m                 | -4.2789 | 16.1967 | -   | +     |
| <i>Hyperolius tuberculatus</i> complex | NMP-P6V 76084    | male | Mafamba, site 2, Pool, Rep. Congo, 271 m                 | -4.2789 | 16.1961 | -   | +     |
| <i>Hyperolius tuberculatus</i> complex | IVB-H-CD15-010   | male | Lisala, Congo River, Bapoto-Mongo, Mongala, DRC, 345 m   | 2.1511  | 21.535  | +   | -     |



## Appendix S1. Additional material examined.

*Afrixalus equatorialis*: NMP-P6V 76073/1 (Yalofili, Bisolo stream, Kokolopori, Tshuapa, DRC; 0.21°N 22.82°E).

*Callixalus pictus*: RMCA B.105145 (holotype; Lutsiro, 2600 m, Kisenyi Territory, Rwanda); CAS 104963, 104965–104967, 145261 (Upper Luvubu River, 2600–2800 m, Itombwe Highlands, Uvira Territory, South Kivu, DRC); MCZ A-64705–64714 (Upper Luvubu River, 2600 m, Itombwe Highlands, Uvira Territory, South Kivu, DRC).

*Chrysobatrachus cupreonitens*: RMCA B.109970 (holotype; Kitadjabukwe River 2800–2850 m, Uvira Territory, South Kivu, DRC); CAS 104968–104969, 104971–104972 (paratypes; Upper Kilungutwe swamp, 2650 m, Itombwe Highlands, Uvira Territory, South Kivu, DRC); MCZ A-64730–64739 (paratypes; Upper Kilungutwe swamps, 2650 m, Itombwe Highlands, Uvira Territory, South Kivu, DRC).

*Congolius robustus* gen. et comb. n.: RMCA 79-24-B-4 (holotype; Gembe, Koiteko swamp, Sankuru, DRC; -3.48°N 23.43°E), 79-24-B-5 (allotype; same locality as holotype), B.61800 (Makaw, Kasai River, Mai-Ndombe, DRC; -3.47°N 18.30°E); NMP-P6V 76087/2 (Yalokole, Luo River, swamp, Kokolopori, Tshuapa, DRC; 0.21°N 22.89°E), IVB-H-CD18-301–302 (Kima Mpela, stream, Kokolopori, Tshuapa, DRC; 0.17°N 22.93°E); ZMUC-R.079697 (Monkoto, Tshuapa, DRC; -1.58°N 20.67°E), R.771151 (Landu River, Lodja, Sankuru, DRC; -3.25°N 23.52°E), R.771174, R.771177–771179 (Kokolopori, Tshuapa, DRC; 0.25°N 22.87°E).

*Cryptothylax minutus*: RMCA B.117082 (holotype; Mabali, Bikoro, Lake Tumba, Équateur, DRC), specimen # 55 from series B.117083–117087 (no individual acc. no., allotype; same locality as holotype).

*Hyperolius balfouri*: IVB-H-CD15-062 (Lisala, swamp, Mongala, Equateur, DRC; 2.15°N 21.53°E).

*H. cf. adpersus*: IVB-H-CD15-139 (Bosolo, spring, Mongala, Equateur, DRC; 1.75°N 21.42°E).

*H. sankuruensis*: RMCA 79-24-B-1 (holotype; Omaniundu, Sankuru, DRC; -3.35°N 23.27°E), 79-24-B-2 (allotype; same locality as holotype); ZMUC-R.771205 (Mabali, Lake Tumba, old IRSAC station, Équateur, DRC; -0.88°N 18.13°E).

*Opisththylax immaculatus*: NMP-P6V 76090/1 (Mindjong, Mbemba forest, site2, Sembé, Sangha, Rep. Congo; 1.49°N 14.37°E).

*Phlyctimantis verrucosus*: NMP-P6V 76085/1 (Yasaka, Kokolopori, Tshuapa, DRC; 0.24°N 22.87°E).

## Appendix S2. Distribution records of *Congolius robustus* gen. et comb. n.

Based on literature, museum materials, and own unpublished data, we provide a list of distribution records of *Congolius robustus* gen. et comb. n., all in present-day DRC (coordinates are approximate; former provinces in parentheses; see Fig. 1a):

Gembe, Koiteko Swamp, Lodja Territory, type locality, -3.48°N 23.43°E, Sankuru (Kasaï-Oriental), Laurent (1979);

Musii River, Lodja Territory, -3.56°N, 23.65°E, Sankuru (Kasaï-Oriental), Laurent (1979);

Onema, Lodja Territory, -3.72°N 23.92°E, Sankuru (Kasaï-Oriental), Laurent (1979);

Omaniundu, Lodja Territory, -3.35°N 23.27°E, Sankuru (Kasaï-Oriental), Laurent (1979);

Lomami, Lomela Territory, -1.92°N 22.70°E, Sankuru (Kasaï-Oriental), Laurent (1979);

Landu River, Lodja, -3.25°N 23.52°E, Sankuru (Kasaï-Oriental), single specimen ZMUC-R.771151 (on exchange from RMCA);

Makaw, Kasai River, -3.47°N 18.30°E, Maï-Ndombe (Bandundu), single specimen RMCA B.61800, collected by E. Jans in 1958;

LuiKotale, Salonga National Park, -2.88°N 20.41°E, Maï-Ndombe (Bandundu), recorded by J. Kielgast in 2008 (pers. comm.);

Monkoto, -1.58°N 20.67°E, Tshuapa (Équateur), Schiøtz (1999, 2006);

Kokolopori Bonobo Nature Reserve, 0.25°N 22.87°E, Tshuapa (Équateur), Schiøtz (2006; the locality was given incorrectly as south of the Equator), several sites within the reserve (own unpublished data; see Supplementary Table S1 for details on investigated material);

Mombongo, Luende stream, 1.64°N 23.15°E, Tshopo (Orientale), this study;

Yawaka, Bechuchuu, 0.51°N 23.15°E, Tshopo (Orientale), this study.



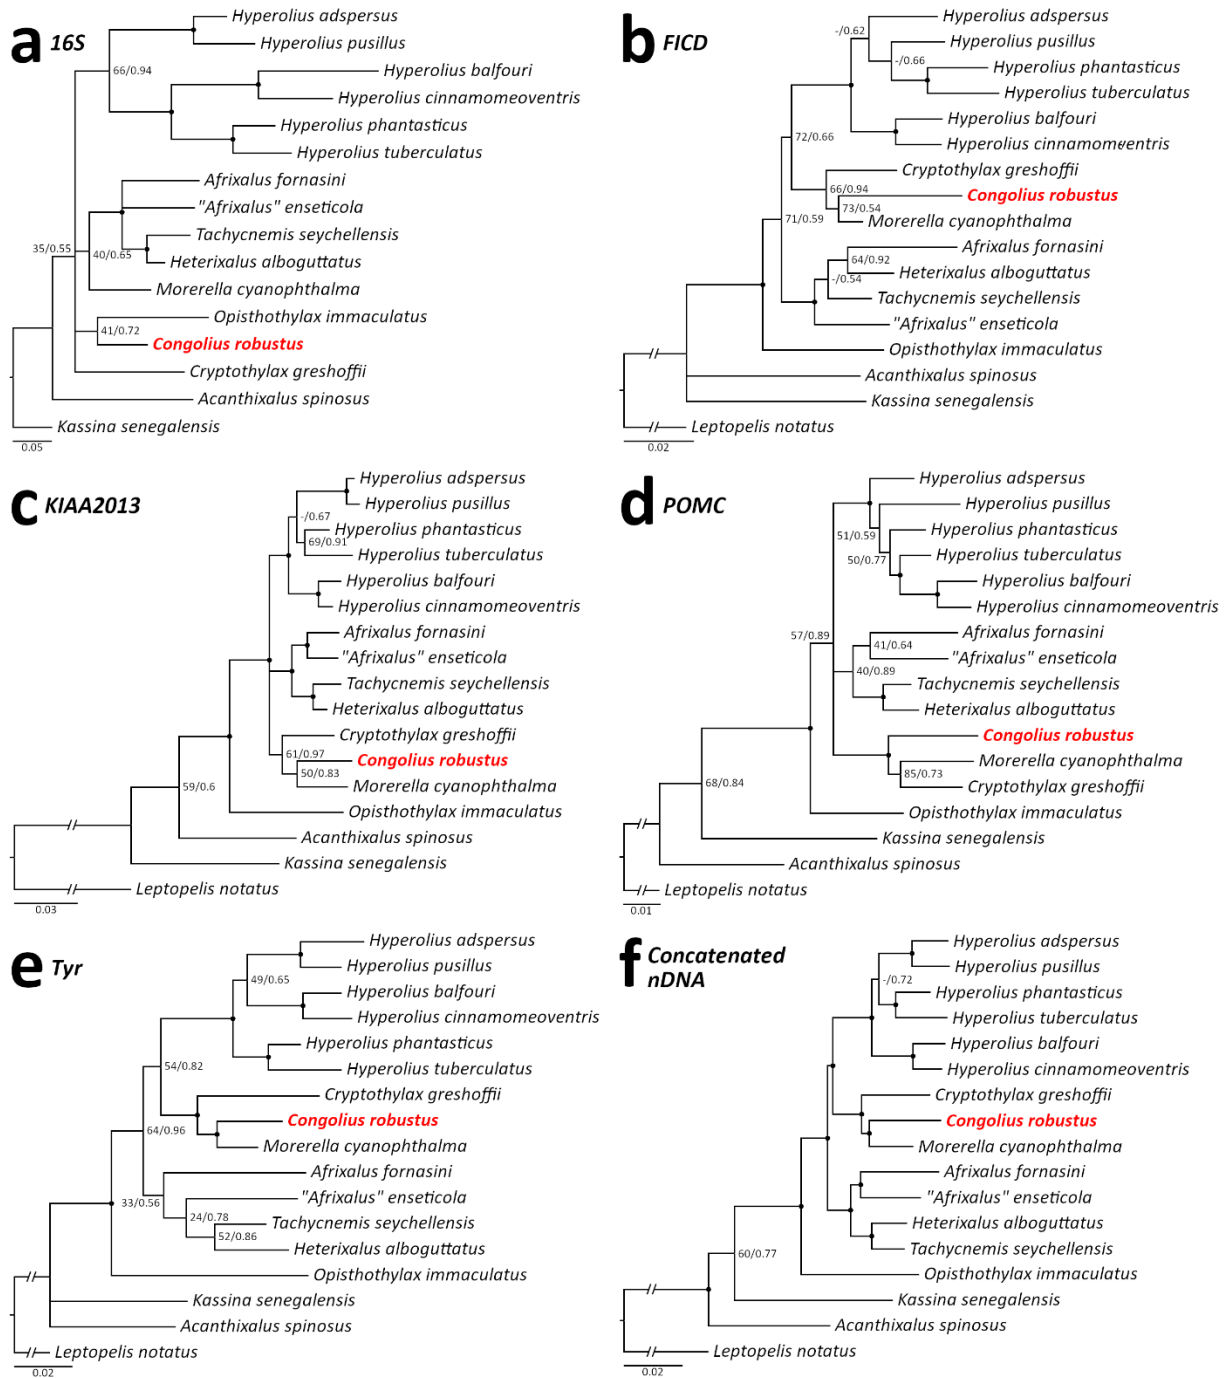

**Figure S3. Bayesian phylogenetic trees of (a–e) individual genetic markers, and (f) concatenated data set based on four nuclear markers.** (a) Mitochondrial *16S rRNA*, (b) *FICD*, (c) *KIAA2013*, (d) *POMC*, (e) *Tyr*, and (f) concatenated nuclear data set. Dots at nodes represent high supports (ML bootstrap  $\geq 70$ /Bayesian posterior probabilities  $\geq 0.95$ ), and numbers show support values for nodes with lower support. GenBank accession numbers are provided in Supplementary Table S5.

**Appendix S3. Resources for comparative diagnosis of *Congolius* gen. n. with other genera of the family Hyperoliidae.**

Morphological characters were taken from Amiet (2000, *Alexteroon*; 2012), Channing *et al.* (2013, *Hyperolius*), Drewes (1984, *Heterixalus*, *Paracassina*, *Semnodactylus*, and other genera), Largen (1975, *Kassina*), Laurent (1940, *Kassinula*; 1950, *Callixalus*; 1951, *Chrysobatrachus*; 1964, *Callixalus*, *Chrysobatrachus*; 1976, *Cryptothylax*, *Phlyctimantis*, *Kassina*; 1982, *Afrixalus*), Laurent & Combaz (1950, *Cryptothylax*, *Phlyctimantis*), Liem (1970), Nussbaum & Wu (1995, *Tachycnemis*), Perret (1988, *Alexteroon*, *Arlequinus*), Rödel *et al.* (2003, *Acanthixalus*; 2009, *Morerella*), Schiøtz (1975; 1999; 2006, *Hyperolius*; 2007), and own unpublished data. See Supplementary Appendix S4 for references.

**Table S2. Uncorrected *p*-distances based on a fragment of the *16S rRNA* gene.** Asterisk denotes specimens of *Congolius robustus* gen. et comb. n. from the same locality (Kokolopori Bonobo Nature Reserve, DRC).

| Species                                                        | GenBank acc. numbers | 1    | 2    | 3    | 4    | 5    | 6    | 7    | 8    | 9    | 10   | 11   | 12   | 13   | 14   | 15   | 16   | 17   | 18 |
|----------------------------------------------------------------|----------------------|------|------|------|------|------|------|------|------|------|------|------|------|------|------|------|------|------|----|
| 1 <i>Congolius robustus</i> gen. et comb. n.*<br>ZMUC-R.771176 | MW626928             | -    |      |      |      |      |      |      |      |      |      |      |      |      |      |      |      |      |    |
| 2 <i>Congolius robustus</i> *<br>IVB-H-CD18-255                | MW626930             | 0.0  | -    |      |      |      |      |      |      |      |      |      |      |      |      |      |      |      |    |
| 3 <i>Congolius robustus</i><br>NMP-P6V 76089                   | MW626929             | 0.4  | 0.4  | -    |      |      |      |      |      |      |      |      |      |      |      |      |      |      |    |
| 4 <i>Morerella cyanophthalma</i>                               | MK498163             | 11.8 | 11.6 | 11.6 | -    |      |      |      |      |      |      |      |      |      |      |      |      |      |    |
| 5 <i>Cryptothylax greshoffii</i>                               | MK509715             | 15.0 | 15.0 | 13.6 | 13.8 | -    |      |      |      |      |      |      |      |      |      |      |      |      |    |
| 6 <i>Hyperolius adspersus</i>                                  | MK509502             | 17.8 | 17.1 | 17.5 | 17.2 | 18.8 | -    |      |      |      |      |      |      |      |      |      |      |      |    |
| 7 <i>Hyperolius pusillus</i>                                   | MK509496             | 18.0 | 16.8 | 17.3 | 17.2 | 20.2 | 8.5  | -    |      |      |      |      |      |      |      |      |      |      |    |
| 8 <i>Hyperolius balfouri</i>                                   | MK509719             | 20.6 | 19.8 | 20.2 | 20.3 | 19.9 | 19.5 | 19.0 | -    |      |      |      |      |      |      |      |      |      |    |
| 9 <i>Hyperolius cinnamomeoventris</i>                          | MK509566             | 20.6 | 20.2 | 20.6 | 20.7 | 19.7 | 19.1 | 17.9 | 14.5 | -    |      |      |      |      |      |      |      |      |    |
| 10 <i>Hyperolius phantasticus</i>                              | MK509672             | 19.2 | 19.2 | 19.6 | 15.8 | 19.5 | 17.1 | 17.8 | 19.0 | 17.9 | -    |      |      |      |      |      |      |      |    |
| 11 <i>Hyperolius tuberculatus</i>                              | MK509553             | 20.2 | 19.8 | 20.2 | 16.0 | 19.9 | 18.6 | 17.6 | 20.0 | 19.2 | 9.0  | -    |      |      |      |      |      |      |    |
| 12 <i>Afrixalus fornasini</i>                                  | MK509484             | 14.1 | 14.1 | 14.5 | 13.5 | 16.9 | 17.1 | 18.2 | 21.4 | 19.8 | 18.8 | 19.1 | -    |      |      |      |      |      |    |
| 13 “ <i>Afrixalus</i> ” <i>enseticola</i>                      | MK509689             | 13.6 | 13.5 | 13.5 | 11.9 | 15.4 | 17.0 | 17.9 | 21.3 | 20.1 | 17.8 | 16.3 | 11.7 | -    |      |      |      |      |    |
| 14 <i>Heterixalus alboguttatus</i>                             | MK509492             | 13.6 | 13.5 | 13.9 | 9.8  | 14.4 | 16.4 | 16.9 | 21.6 | 20.5 | 16.7 | 17.3 | 11.0 | 9.7  | -    |      |      |      |    |
| 15 <i>Tachycnemis seychellensis</i>                            | MK509675             | 13.6 | 15.4 | 15.9 | 11.4 | 14.8 | 19.5 | 19.9 | 22.8 | 19.8 | 18.3 | 17.9 | 10.8 | 10.2 | 6.8  | -    |      |      |    |
| 16 <i>Opisthothylax immaculatus</i>                            | MK509570             | 12.8 | 12.0 | 12.4 | 13.2 | 15.1 | 17.6 | 18.1 | 20.9 | 18.6 | 18.9 | 19.0 | 15.1 | 12.8 | 13.4 | 14.6 | -    |      |    |
| 17 <i>Acanthixalus spinosus</i>                                | MK509618             | 16.5 | 16.1 | 16.1 | 11.9 | 18.2 | 19.7 | 19.7 | 21.7 | 20.7 | 19.0 | 19.2 | 16.9 | 18.0 | 15.3 | 17.8 | 18.4 | -    |    |
| 18 <i>Kassina senegalensis</i>                                 | MK509663             | 13.6 | 13.1 | 13.5 | 13.6 | 13.7 | 17.5 | 18.6 | 20.0 | 19.4 | 17.7 | 19.1 | 14.5 | 15.9 | 14.1 | 15.5 | 13.2 | 15.2 | -  |

**Table S3. Factor loadings of the first three principal components of PCA of body shape.**

Values of the most contributing variables in bold.

| Component      | HW           | HDL          | IOD  | ED   | ENL          | IND         | SL           | HL           | RL           | HaL          | DW    | FL    | TL           | FoL          | MANOVA             |
|----------------|--------------|--------------|------|------|--------------|-------------|--------------|--------------|--------------|--------------|-------|-------|--------------|--------------|--------------------|
| PC1<br>(31.7%) | -0.24        | <b>-1.12</b> | 0.86 | 0.87 | <b>-1.11</b> | <b>1.14</b> | <b>-1.14</b> | 0.49         | 0.37         | -0.44        | 0.76  | 0.25  | 0.72         | -0.87        | $F_{5,15} = 57.07$ |
| PC2<br>(20.3%) | <b>1.00</b>  | 0.15         | 0.74 | 0.18 | -0.38        | 0.68        | 0.02         | <b>-1.03</b> | <b>-0.94</b> | 0.36         | 0.15  | -0.78 | <b>-0.94</b> | -0.22        | $p = <2.2e-16$     |
| PC3<br>(12.9%) | <b>-0.68</b> | 0.25         | 0.22 | 0.59 | <b>0.69</b>  | -0.12       | 0.47         | -0.41        | -0.40        | <b>-0.98</b> | -0.01 | -0.30 | 0.17         | <b>-0.83</b> |                    |

**Congolius robustus** gen. et comb. n.  
ZMUC-R.771175

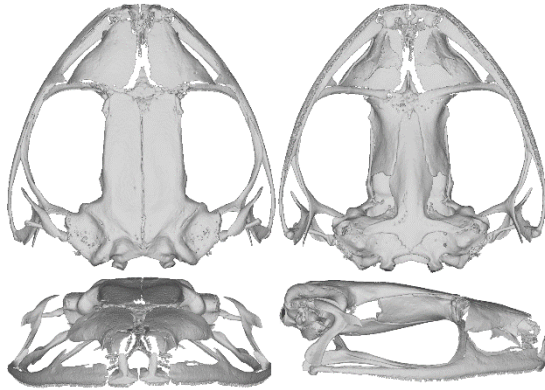

**Congolius robustus** gen. et comb. n.  
ZMUC-R.771176

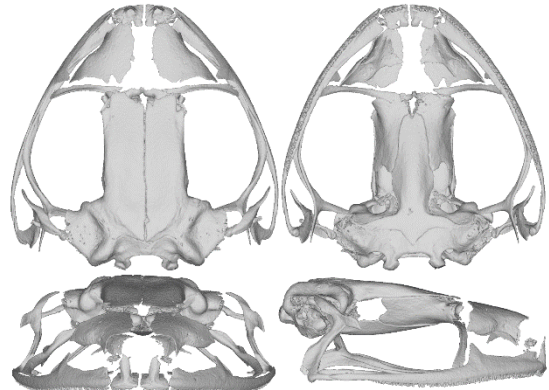

**Hyperolius balfouri**  
IVB-H-CD15-061

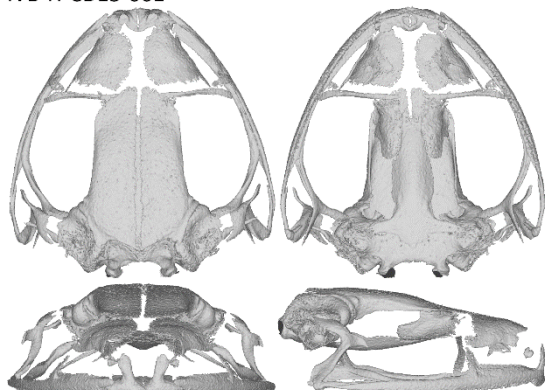

**Hyperolius tuberculatus**  
IVB-H-CD15-010

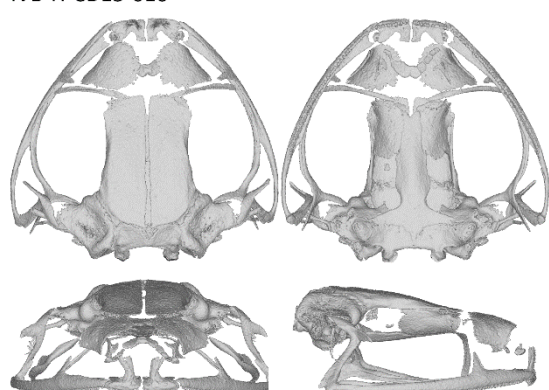

**Cryptothylax greshoffii**  
IVB-H-CD15-169

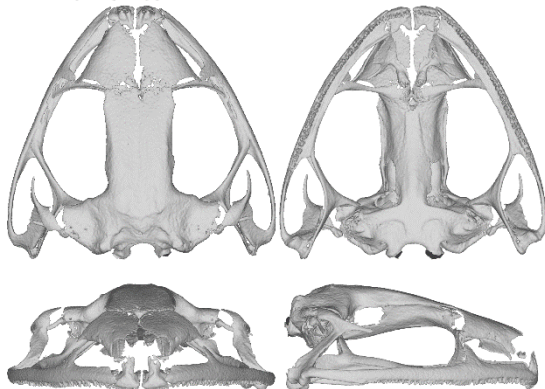

**Chrysobatrachus cupreonitens**  
CAS 145263

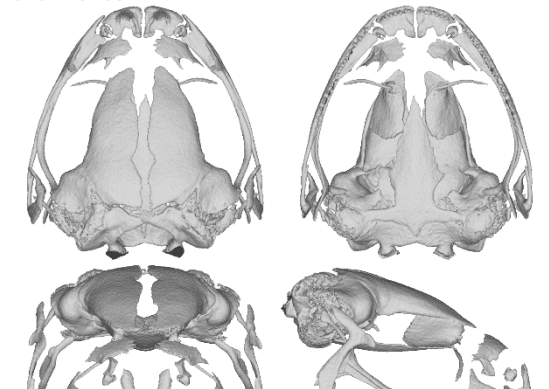

**Callixalus pictus**  
CAS 145260

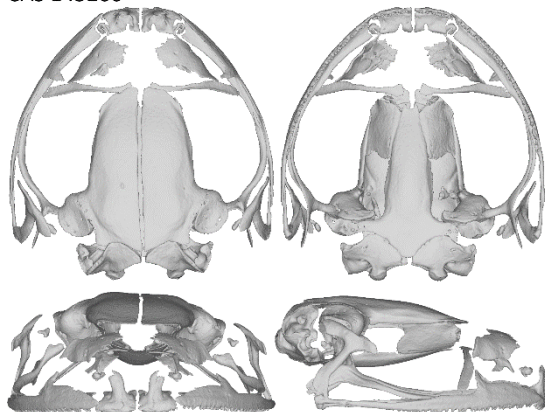

**Acanthixalus spinosus**  
CAS 153800

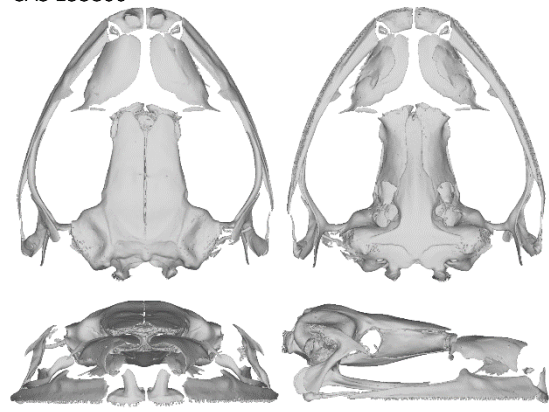

**Figure S4. Cranial morphology of all examined specimens.** From top left: *Congolius robustus* gen. et comb. n. (ZMUC-R.771175, male), *C. robustus* (ZMUC-R.771176, female), *Hyperolius balfouri* (IVB-H-CD15-061, male), *H. cf. tuberculatus* (IVB-H-CD15-010, male), *Cryptothylax greshoffii* (IVB-H-CD15-169, male), *Chrysobatrachus cupreonitens* (CAS 145263, male), *Callixalus pictus* (CAS 145260, male), and *Acanthixalus spinosus* (CAS 153800, female). Reconstructions in dorsal, ventral, frontal, and lateral views are based on high-resolution X-ray microcomputed tomography. Skull views are scaled to a similar size among the specimens.

**Table S4. Factor scores of the first two principal components of PCA of cranial shape.**  
 Taxa in bold are similar in the shape of their skulls.

| Component   | <i>Hyperolius tuberculatus</i> | <b><i>Hyperolius balfouri</i></b> | <i>Congolius robustus</i><br>gen. et comb. n. | <i>Cryptothylax greshoffii</i> |
|-------------|--------------------------------|-----------------------------------|-----------------------------------------------|--------------------------------|
| PC1 (65.1%) | -0.064                         | <b>-0.018</b>                     | <b>0.007</b>                                  | 0.076                          |
| PC2 (28.5%) | 0.038                          | <b>-0.031</b>                     | <b>-0.036</b>                                 | 0.028                          |



**Table S5. Taxa and samples included in phylogenetic analyses with GenBank accession numbers. Asterisk denotes outgroups.**

| Species                                                      | <i>16S</i> | <i>FICD</i> | <i>KIAA2013</i> | <i>POMC</i> | <i>Tyr</i> |
|--------------------------------------------------------------|------------|-------------|-----------------|-------------|------------|
| * <i>Acanthixalus spinosus</i>                               | MK509618   | MK498693    | MK498898        | MK499174    | MK498413   |
| <i>Afrixalus enseticola</i>                                  | MK509689   | MK498520    | MK498923        | MK498959    | MK498374   |
| <i>Afrixalus fornasini</i>                                   | MK509484   | MK498507    | MK498804        | MK499057    | MK498390   |
| <i>Congolius robustus</i> gen. et. comb. n.<br>ZMUC-R.771176 | MW626928   | MW626916    | MW626919        | MW626922    | MW626925   |
| <i>Congolius robustus</i><br>NMP-P6V 76089                   | MW626929   | MW626917    | MW626920        | MW626923    | MW626926   |
| <i>Congolius robustus</i><br>IVB-H-CD18-255                  | MW626930   | MW626918    | MW626921        | MW626924    | MW626927   |
| <i>Cryptothylax greshoffii</i>                               | MK509715   | MK498689    | MK498705        | MK498956    | MK498434   |
| <i>Heterixalus alboguttatus</i>                              | MK509492   | MK498523    | MK498893        | MK499154    | MK498371   |
| <i>Hyperolius adspersus</i>                                  | MK509502   | MK498632    | MK498931        | MK498992    | MK498264   |
| <i>Hyperolius balfouri</i>                                   | MK509719   | MK498481    | MK498869        | MK499101    | MK498032   |
| <i>Hyperolius cinnamomeoventris</i>                          | MK509566   | MK498473    | MK498811        | MK499132    | MK498272   |
| <i>Hyperolius phantasticus</i>                               | MK509672   | MK498677    | MK498794        | MK498998    | MK498265   |
| <i>Hyperolius pusillus</i>                                   | MK509496   | MK498603    | MK498887        | MK499047    | MK498225   |
| <i>Hyperolius tuberculatus</i>                               | MK509553   | MK498635    | MK498878        | MK499111    | MK498206   |
| * <i>Kassina senegalensis</i>                                | MK509663   | MK498621    | MK498940        | MK499186    | MK498427   |
| * <i>Leptopelis notatus</i>                                  | -          | KX492679    | KX492732        | KX492782    | KX492876   |
| <i>Morerella cyanophthalma</i>                               | MK498163   | MK498608    | MK498915        | MK499159    | MK498411   |
| <i>Opisththylax immaculatus</i>                              | MK509570   | MK498629    | MK498946        | MK499171    | MK498430   |
| <i>Tachycnemis seychellensis</i>                             | MK509675   | MK498585    | MK498924        | MK499156    | MK498396   |

**Table S6. Primers used to amplify selected markers.**

| Marker          | Primer         | Sequence (5'-3')                                              | Source                                |
|-----------------|----------------|---------------------------------------------------------------|---------------------------------------|
| <i>16S</i>      | 16SL1          | CGC CTG TTT AAC AAA AAC AT                                    | Palumbi <i>et al.</i> 1991 (modified) |
| <i>16S</i>      | 16SH1          | CCG GTC TGA ACT CAG ATC ACG T                                 | Palumbi <i>et al.</i> 1991            |
| <i>FICD</i>     | FICD F1        | CCK CTN GTN GAR ATH GAY CA                                    | Shen <i>et al.</i> 2013               |
| <i>FICD</i>     | FICD R1        | TYT CNG TRC AYT TNG CDA TRA A                                 | Shen <i>et al.</i> 2013               |
| <i>FICD</i>     | FICD F2        | AGG GTT TTC CCA GTX ACG ACT ACT AYC AYC AYA THT<br>AYC AYA C  | Shen <i>et al.</i> 2013               |
| <i>FICD</i>     | FICD R2        | AGA TAA CAA TTT CAC ACA GGA ARG GCC KVA CRT CNC<br>CYT CRT T  | Shen <i>et al.</i> 2013               |
| <i>KIAA2013</i> | KIAA2013<br>F1 | CTS AAN TAY GCN GAY CAY TGY TT                                | Shen <i>et al.</i> 2013               |
| <i>KIAA2013</i> | KIAA2013<br>R1 | CCN GGN CCR CAR TAY TCR TTR TA                                | Shen <i>et al.</i> 2013               |
| <i>KIAA2013</i> | KIAA2013<br>F2 | AGG GTT TTC CCA GTC ACG ACA CYA TGC AYG CNG AGA<br>AYY TGT GG | Shen <i>et al.</i> 2013               |
| <i>KIAA2013</i> | KIAA2013<br>R2 | AGA TAA CAA TTT CAC ACA GGG ANG CCA CNC TRA ACC<br>ARA A      | Shen <i>et al.</i> 2013               |
| <i>POMC</i>     | POMC-1         | GAA TGT ATY AAA GMM TGC AAG ATG GWC CT                        | Wiens <i>et al.</i> 2005              |
| <i>POMC</i>     | POMC-7         | TGG CAT TTT TGA AAA GAG TCA T                                 | Smith <i>et al.</i> 2005              |
| <i>Tyr</i>      | Tyr 1C         | GGC AGA GGA WCR TGC CAA GAT GT                                | Bossuyt & Milinkovitch 2000           |
| <i>Tyr</i>      | Tyr 1G         | TGC TGG CRT CTC TCC ART CCC A                                 | Bossuyt & Milinkovitch 2000           |

**Table S7. Substitution models used in phylogenetic analyses.**

| Separate analysis                         | MrBayes and RAxML-NG |                 |                 | StarBEAST2      |                 |                 |
|-------------------------------------------|----------------------|-----------------|-----------------|-----------------|-----------------|-----------------|
|                                           | 1 <sup>st</sup>      | 2 <sup>nd</sup> | 3 <sup>rd</sup> | 1 <sup>st</sup> | 2 <sup>nd</sup> | 3 <sup>rd</sup> |
| <i>16S</i>                                | GTR+I+G              |                 |                 | -               |                 |                 |
| <i>FICD</i>                               | K80+I                | F81+I           | K80+G           | K80+I           | F81+I           | K80+G           |
| <i>KIAA2013</i>                           | K80+G                |                 | HKY+G           | K80+G           | HKY+G           |                 |
| <i>POMC</i>                               | HKY+I                |                 | K80+G           | HKY+I           | K80+G           |                 |
| <i>Tyr</i>                                | K80+I+G              |                 | HKY+G           | K80+I+G         | HKY+G           |                 |
| Concatenated nDNA<br>data set             | MrBayes and RAxML-NG |                 |                 | StarBEAST2      |                 |                 |
|                                           | 1 <sup>st</sup>      | 2 <sup>nd</sup> | 3 <sup>rd</sup> |                 |                 |                 |
| <i>FICD</i>                               | HKY+I+G              | HKY+I           | K80+G           | -               |                 |                 |
| <i>KIAA2013</i>                           | K80                  | HKY+I           | HKY+G           | -               |                 |                 |
| <i>POMC</i>                               | HKY+I+G              |                 | K80+G           | -               |                 |                 |
| <i>Tyr</i>                                | HKY+I+G              |                 | HKY+G           | -               |                 |                 |
| Concatenated nDNA<br>+ <i>16S</i> dataset | MrBayes and RAxML-NG |                 |                 | StarBEAST2      |                 |                 |
|                                           | 1 <sup>st</sup>      | 2 <sup>nd</sup> | 3 <sup>rd</sup> |                 |                 |                 |
| <i>16S</i>                                | GTR+I+G              |                 |                 | -               |                 |                 |
| <i>FICD</i>                               | HKY+I                | K80+G           | HKY+I+G         | -               |                 |                 |
| <i>KIAA2013</i>                           | K80                  | HKY+I           | HKY+G           | -               |                 |                 |
| <i>POMC</i>                               | HKY+I+G              |                 | K80+G           | -               |                 |                 |
| <i>Tyr</i>                                | HKY+I+G              |                 | HKY+G           | -               |                 |                 |

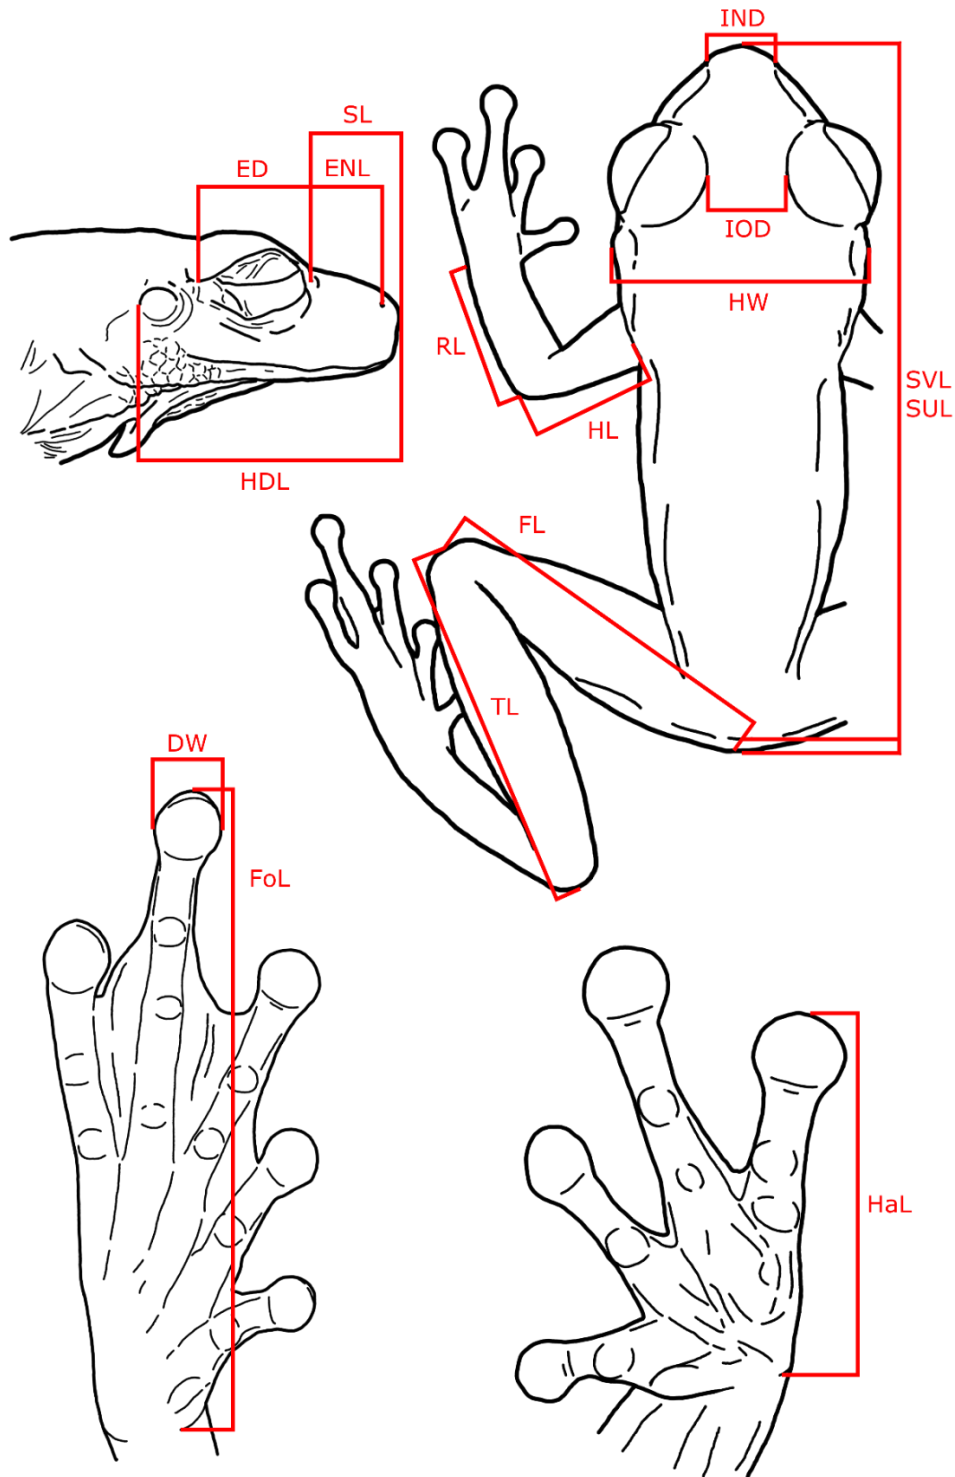

**Figure S5. Visualization of 16 measured characters:** snout-vent length (SVL), snout-urostyle length (SUL), head width (HW), head length (HDL), interorbital distance (IOD), eye diameter (ED), eye-nostril length (ENL), internarial distance (IND), snout length (SL), humerus length (HL), radioulna length (RL), hand length (HaL), femur length (FL), tibiofibula length (TL), foot length (FoL), disc width (DW). Illustration based on *Congolius robustus* gen. et comb. n. by T.N.

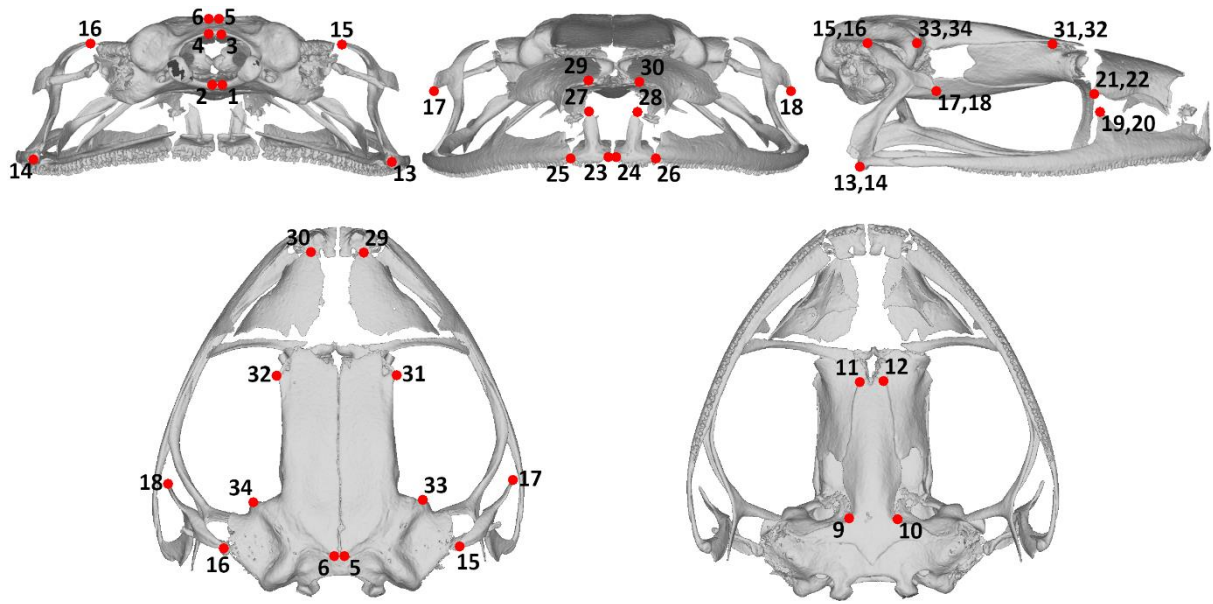

**Figure S6. Visualization of 32 digitized landmarks.** Adapted and modified from Paluh *et al.* (2020), displayed on a skull  $\mu$ CT scan of a female *Congolius robustus* gen. et comb. n. (ZMUC-R.771176). Views from top left: posterior, anterior, lateral, dorsal, and ventral.

#### Appendix S4. References used in Supplementary material in alphabetical order.

- Amiet, J.-L. Les *Alexteroon* du Cameroun (Amphibia, Anura, Hyperoliidae). *Alytes* **17**, 125–164 (2000).
- Amiet, J.-L. *Les rainettes du Cameroun (Amphibiens Anoures)* (J.-L. Amiet & La Nef des Livres, 2012).
- Bossuyt, F. & Milinkovitch, M. C. Convergent adaptive radiations in Madagascan and Asian ranid frogs reveal covariation between larval and adult traits. *Proc. Natl. Acad. Sci. U.S.A.* **97**, 6585–6590 (2000).
- Channing, A. & Rödel, M.-O. *Field Guide to the Frogs & Other Amphibians of Africa* (Struik Nature, 2019).
- Channing, A. *et al.* Taxonomy of the super-cryptic *Hyperolius nasutus* group of long reed frogs of Africa (Anura: Hyperoliidae), with descriptions of six new species. *Zootaxa* **3620**, 301–350 (2013).
- Drewes, R. C. A phylogenetic analysis of the Hyperoliidae (Anura): treefrogs of Africa, Madagascar, and the Seychelles Islands. *Occas. Pap. California Acad. Sci.* **139**, 1–70 (1984).
- Largen, M. J. The status of the genus *Kassina* (Amphibia Anura Hyperoliidae) in Ethiopia. *Monit. Zool. Ital., Suppl. VI* **1**, 1–28 (1975).
- Laurent, R. F. Description d'un Rhacophoride nouveau du Congo Belge (Batracien). *Rev. Zool. Bot. Afr.* **33**, 313–316 (1940).
- Laurent, R. F. Diagnoses préliminaires de treize Batraciens nouveaux d'Afrique centrale. *Rev. Zool. Bot. Afr.* **44**, 1–18 (1950).
- Laurent, R. F. Deux Reptiles et onze Batraciens nouveaux d'Afrique centrale. *Rev. Zool. Bot. Afr.* **44**, 360–381 (1951).
- Laurent, R. F. Adaptive modifications in frogs of an isolated highland fauna in Central Africa. *Evolution* **18**, 458–467 (1964).
- Laurent, R. F. Les genres *Cryptothylax*, *Phlyctimantis* et *Kassina* au Zaïre. *Ann. Mus. Congo Tervuren, Zool.* **213**, 1–67 (1976).
- Laurent, R. F. Description de deux *Hyperolius* nouveaux du Sankuru (Zaire). *Rev. Zool. Bot. Afr.* **93**, 779–791 (1979).
- Laurent, R. F. Le genre *Afrivalus* Laurent (Hyperoliidae) en Afrique centrale. *Ann. Mus. Congo Tervuren, Zool.* **235**, 1–58 (1982).
- Laurent, R. F. & Combaz, J. Sur l'attribution générique de certains batraciens appartenant à la sous-famille des Hyperoliinae. *Rev. Zool. Bot. Afr.* **43**, 269–280 (1950).
- Liem, S. S. The morphology, systematics, and evolution of the Old World treefrogs (Rhacophoridae and Hyperoliidae). *Fieldiana Zool.* **57**, 1–145 (1970).

- Nussbaum, R. A. & Wu, S. H. Distribution, variation, and systematics of the Seychelles treefrog, *Tachycnemis seychellensis* (Amphibia: Anura: Hyperoliidae). *J. Zool.* **236**, 383–406 (1995).
- Palumbi, S. *et al.* *The Simple Fool's Guide to PCR* (University of Hawaii, 1991).
- Perret, J.-L. Sur quelques genres d'Hyperoliidae (Anura) restés en question. *Bull. Soc. Neuchâtel Sci. Nat.* **111**, 35–48 (1988).
- Rödel, M.-O., Kosuch, J., Veith, M. & Ernst, R. First Record of the Genus *Acanthixalus* Laurent, 1944 from the Upper Guinean Rain Forest, West Africa, with the Description of a New Species. *J. Herpetol.* **37**, 43–52 (2003).
- Rödel, M.-O. *et al.* A new tree-frog genus and species from Ivory Coast, West Africa (Amphibia: Anura: Hyperoliidae). *Zootaxa* **2044**, 23–45 (2009).
- Schiøtz, A. *The Treefrogs of Eastern Africa* (Steenstrupia, 1975).
- Schiøtz, A. *Treefrogs of Africa* (Edition Chimaira, 1999).
- Schiøtz, A. Notes on the genus *Hyperolius* (Anura, Hyperoliidae) in central République Démocratique du Congo. *Alytes* **24**, 40–60 (2006).
- Schiøtz, A. Treefrogs of Africa. Addenda & Corrigenda 2007. Unpublished manuscript, available as pdf from <http://zoologi.snm.ku.dk> (accessed 27 July 2008), 1–14 (2007).
- Shen, X. X., Liang, D., Feng, Y. J., Chen, M. Y. & Zhang, P. A versatile and highly efficient toolkit including 102 nuclear markers for vertebrate phylogenomics, tested by resolving the higher level relationships of the Caudata. *Mol. Biol. Evol.* **30**: 2235–2248 (2013).
- Smith, S. A., Stephens, P. R. & Wiens, J. J. Replicate patterns of species richness, historical biogeography, and phylogeny in Holarctic treefrogs. *Evolution* **59**, 2433–2450 (2005).
- Wiens, J. J., Fetzner, Jr. J. W., Parkinson, C. L. & Reeder, T. W. Hylid frog phylogeny and sampling strategies for speciose clades. *Syst. Biol.* **54**, 778–807 (2005).
